# Supplementary material for: Design and Engineering of “Green” Nanoemulsions for Enhanced Topical Delivery of Bakuchiol Achieved in a Sustainable Manner: A Novel Eco-Friendly Approach to Bioretinol
Source: MDPI journal article supplement (doi:10.3390/ijms221810091), 2021-09-18
Supplement: s1 [file s1]

## Supplementary Materials

### Design and Engineering of “Green” Nanoemulsions for Enhanced Topical Delivery of Bakuchiol Achieved in a Sustainable Manner: A Novel Eco-Friendly Approach to Bioretinol

Agnieszka Lewińska <sup>1,\*</sup>, Marta Domżał-Kędzia <sup>2</sup>, Ewa Maciejczyk <sup>3</sup>, Marcin Łukaszewicz <sup>2</sup> and Urszula Bazylińska<sup>4,\*</sup>

<sup>1</sup> Faculty of Chemistry, University of Wrocław, Joliot-Curie 14, 50-383 Wrocław, Poland

<sup>2</sup> Department of Biotransformation, Faculty of Biotechnology, University of Wrocław, Joliot-Curie 14a, 50-383 Wrocław, Poland; marta.domzal@uwr.edu.pl (M.D.-K.); marcin.lukaszewicz@uwr.edu.pl (M.Ł.)

<sup>3</sup> Institute of Natural Products and Cosmetics, Faculty of Biotechnology and Food Sciences, Lodz University of Technology, Stefanowskiego 2/22, 90-924 Lodz, Poland; ewa.maciejczyk@p.lodz.pl

<sup>4</sup> Laboratory of Nanocolloids and Disperse Systems, Department of Physical and Quantum Chemistry, Faculty of Chemistry, Wrocław University of Science and Technology, Wybrzeże Wyspiańskiego 27, 50-370 Wrocław, Poland

\* Correspondence: agnieszka.lewinska@chem.uni.wroc.pl (A.L.); urszula.bazylińska@pwr.edu.pl (U.B.)

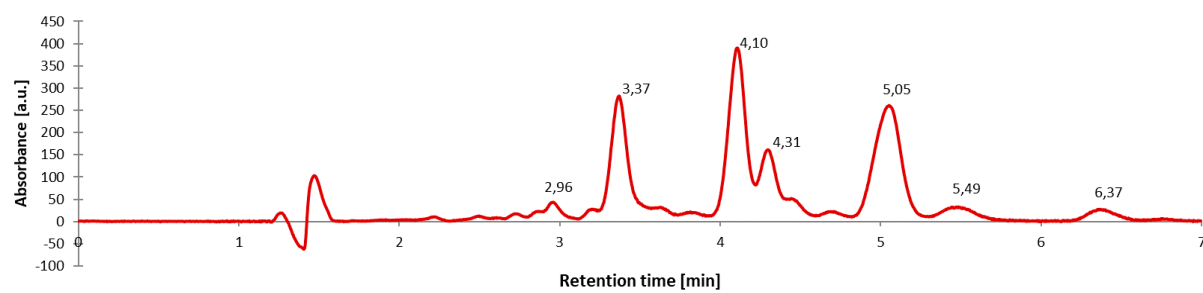

**Fig. S1.** Analytical chromatogram of the synthesized surfactin.

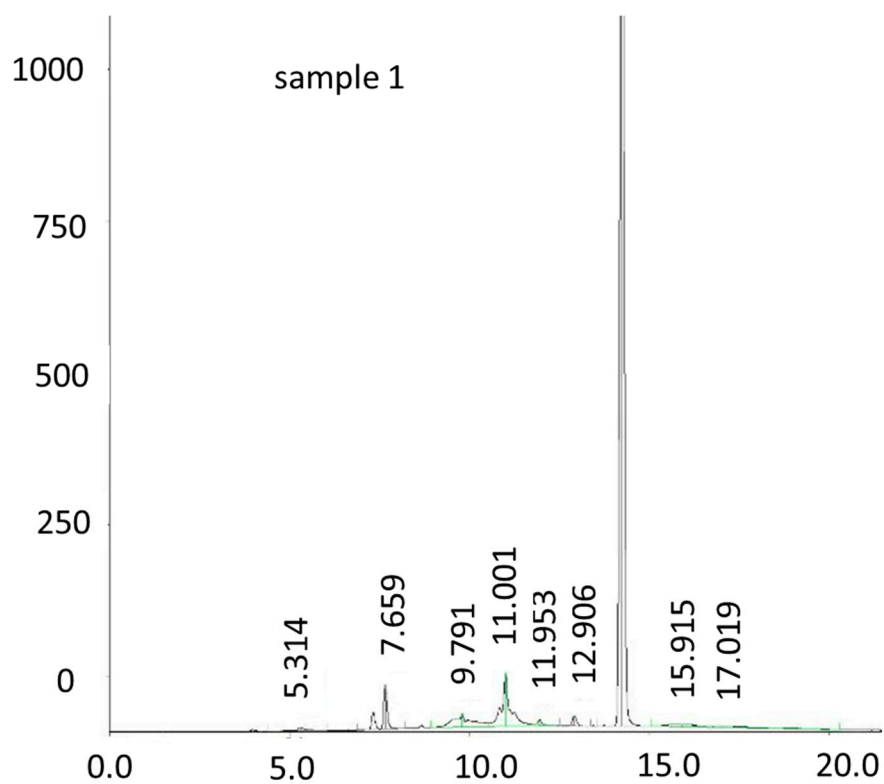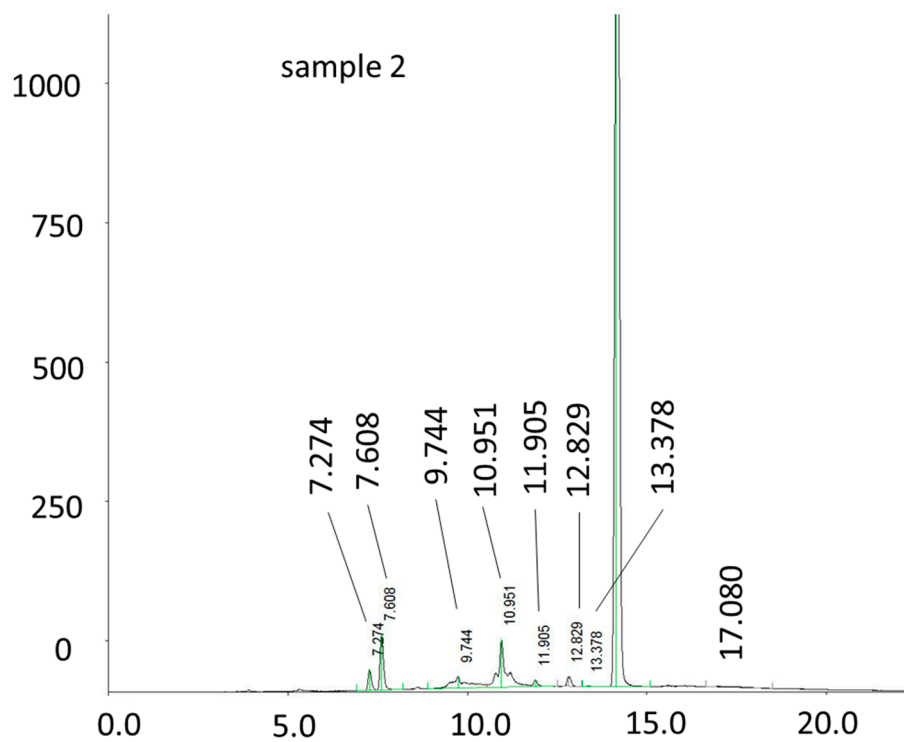

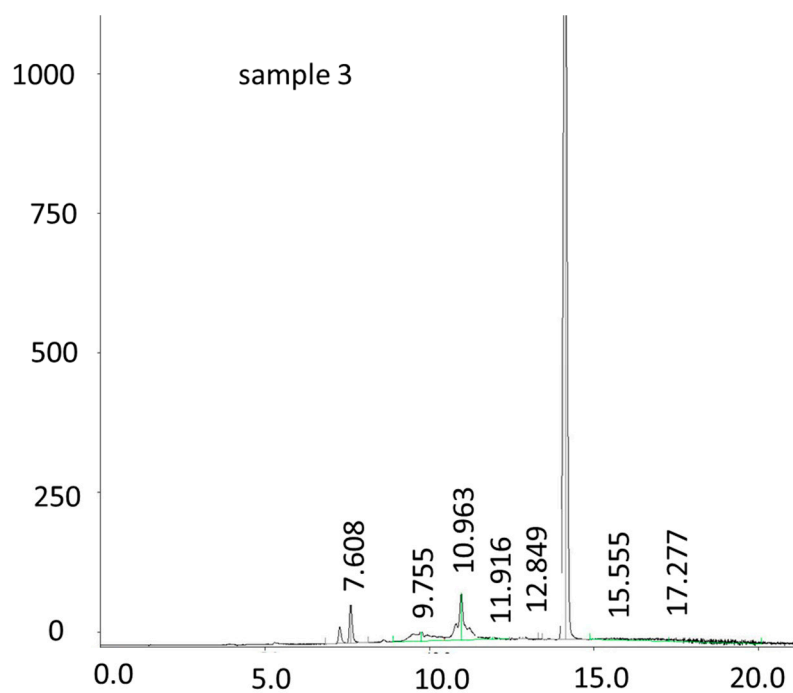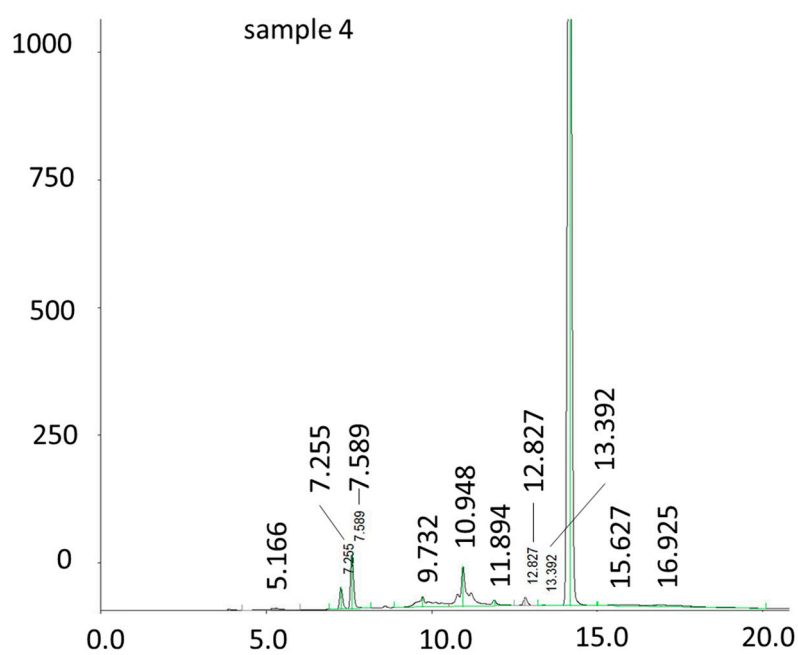

**Fig. S2.** Chromatogram of bakuchiol extracts from SC-CO<sub>2</sub> extraction.

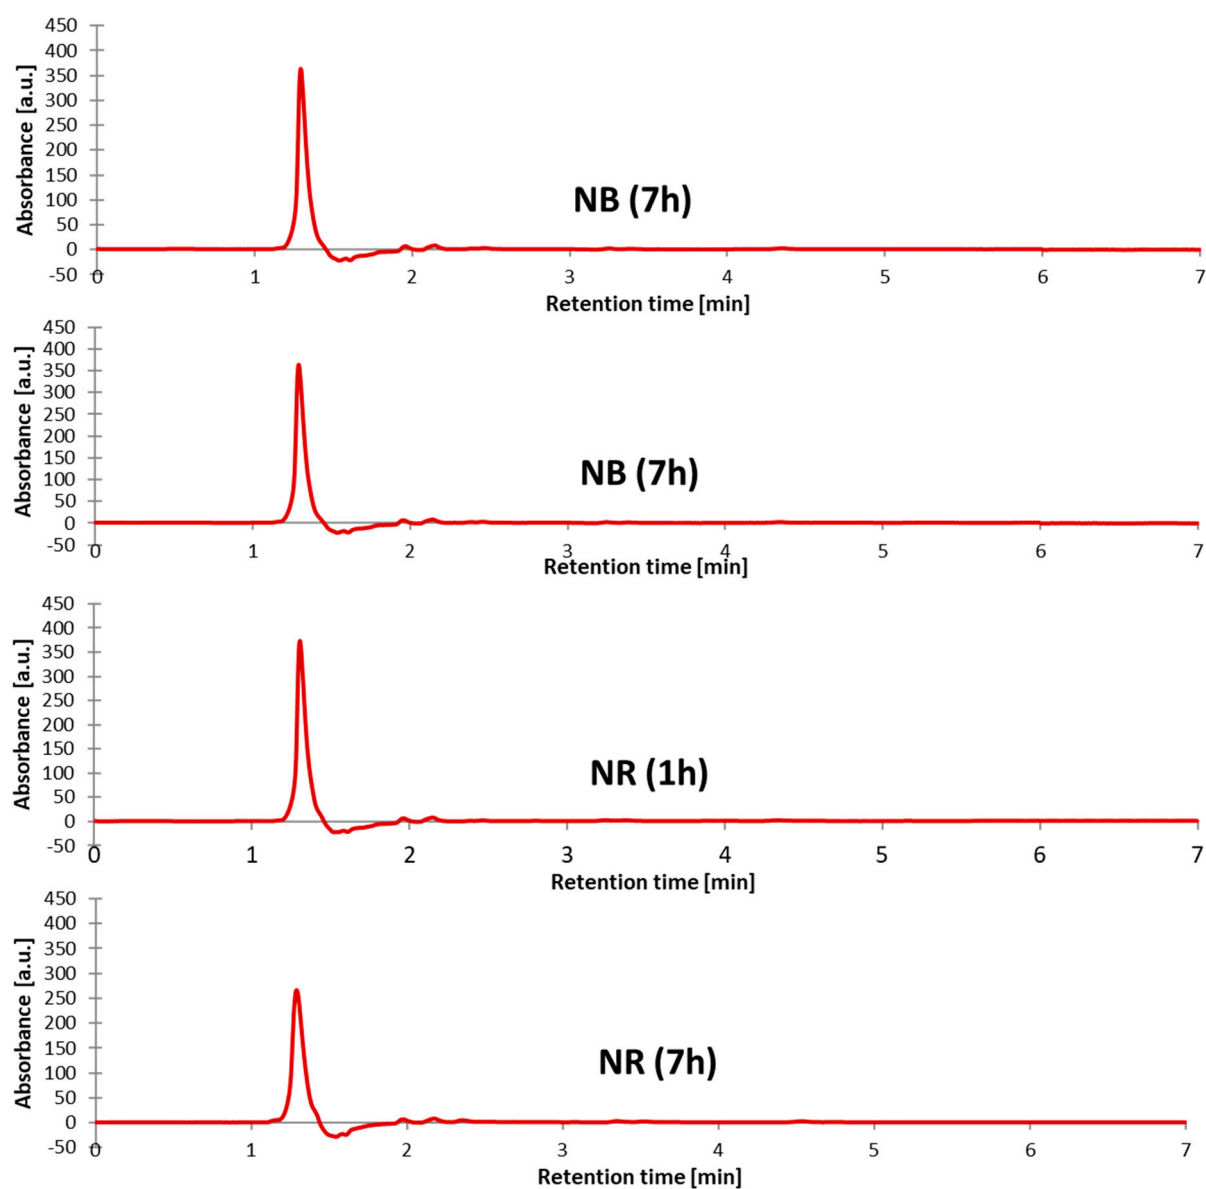

**Fig. S3.** Analytical chromatogram fluid from the Franz acceptor chamber - identify the surfactin in the acceptor fluid.

**Table S1.** Characteristics of the control nanoemulsion with retinol.

| System     | Nanoemulsion composition / % |                |                | $D_H^d$ / nm | PdI <sup>e</sup> | $\zeta^f$ / mV |
|------------|------------------------------|----------------|----------------|--------------|------------------|----------------|
|            | S <sup>a</sup>               | O <sup>b</sup> | W <sup>c</sup> |              |                  |                |
| T= 0 days  |                              |                |                |              |                  |                |
| 4S         | 5                            | 1              | 94             | 225          | 0,194            | -72            |
| T= 30 days |                              |                |                |              |                  |                |
| 4S         | 5                            | 1              | 94             | 228          | 0,197            | -77            |

<sup>a</sup> Surfactant, <sup>b</sup> Oil, <sup>c</sup> Water, <sup>d</sup>  $D_H$ : hydrodynamic diameter (Z-Ave). <sup>e</sup> PdI: polydispersity index. <sup>f</sup>  $\zeta$ : zeta potential.
